# Supplementary material for: Molecular engineering of pyrene carbazole dyes with a single bond and double bond as the mode of linkage
Source: Royal Society of Chemistry journal article supplement (doi:10.1039/d0nj03228j), 2020-01-01
Supplement: d0nj03228j1.pdf [file d0nj03228j1.pdf]

## Supporting Information

### Molecular engineering of pyrene carbazole dyes with a single bond and double bond as the mode of linkage

Divya Unny<sup>1#</sup>, Ganapathi Rao Kandregula<sup>1#</sup>, Jagadeeswari Sivanadanam<sup>1,2\*</sup> and Kothandaraman Ramanujam<sup>1,2\*</sup>

<sup>1</sup>*Department of Chemistry, Indian Institute of Technology Madras, Chennai, India, 600 036*

<sup>2</sup>*DST-IITM Solar Energy Harnessing Centre, Indian Institute of Technology Madras, Chennai, India, 600 036*

# *Contributed equally*

\**Corresponding author's email: [rkraman@iitm.ac.in](mailto:rkraman@iitm.ac.in); [jagadhi333@gmail.com](mailto:jagadhi333@gmail.com)*

---

#### List of content:

1. **Scheme S1** Synthetic route of intermediate (3) and (6) and reference dye (PC0).
2. **Fig. S1** <sup>1</sup>H, <sup>13</sup>C and Mass spectrum of intermediate (2).
3. **Fig. S2** <sup>1</sup>H, <sup>13</sup>C and Mass spectrum of intermediate (3).
4. **Fig. S3** <sup>1</sup>H, <sup>13</sup>C and Mass spectrum of intermediate (8).
5. **Fig. S4** <sup>1</sup>H, <sup>13</sup>C and Mass spectrum of intermediate (9).
6. **Fig. S5** <sup>1</sup>H, <sup>13</sup>C and Mass spectrum of PC1 dye.
7. **Fig. S6** <sup>1</sup>H, <sup>13</sup>C and Mass spectrum of PC2 dye.
8. **Fig. S7** Thickness of mesoporous TiO<sub>2</sub> coated on FTO plate measured using Nanomap Profilometer.
9. **Fig. S8** J-V characteristics of devices sensitized with different solvents with and without CDCA PC0 (a, b) PC1 (c, d) PC2 (e, f) under one sun illumination (100 mWcm<sup>-2</sup>).
10. **Table S1** HOMO, LUMO, calculated using B3LYP, CAM-B3LYP, M06, M06-2X, PBE1PBE, WB97XD/6-31G(d,p) method.
11. **Table S2** The projected density of states (PDOS) analysis of three dyes obtained using the B3LYP/6-31G(d,p) method.
12. **Table S3** Optimization of solvents for PC0 dye.
13. **Table S4** Optimization of solvents for PC1 dye.
14. **Table S5** Optimization of solvents for PC2 dye.



**Scheme S1** Synthetic route of intermediate (**3**) and (**6**) and reference dye (**PC0**).

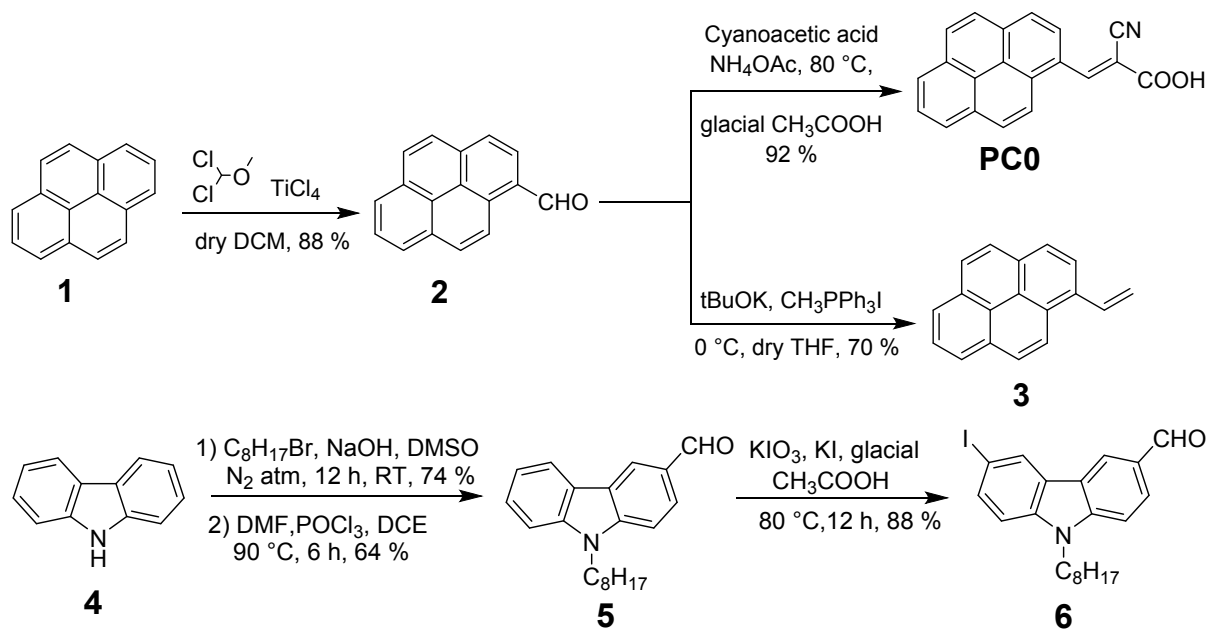

Fig. S1  $^1\text{H}$ ,  $^{13}\text{C}$  and Mass spectrum of intermediate (2).

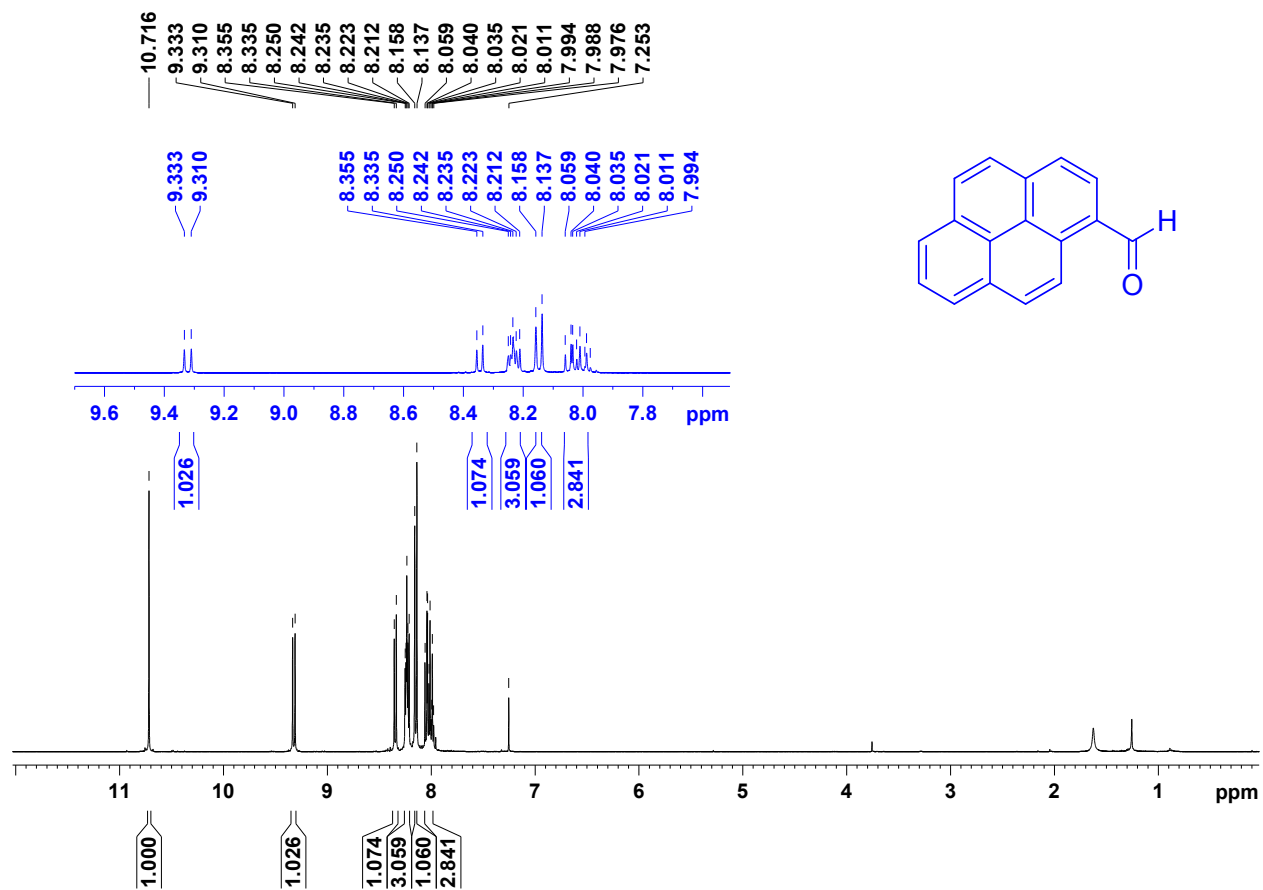

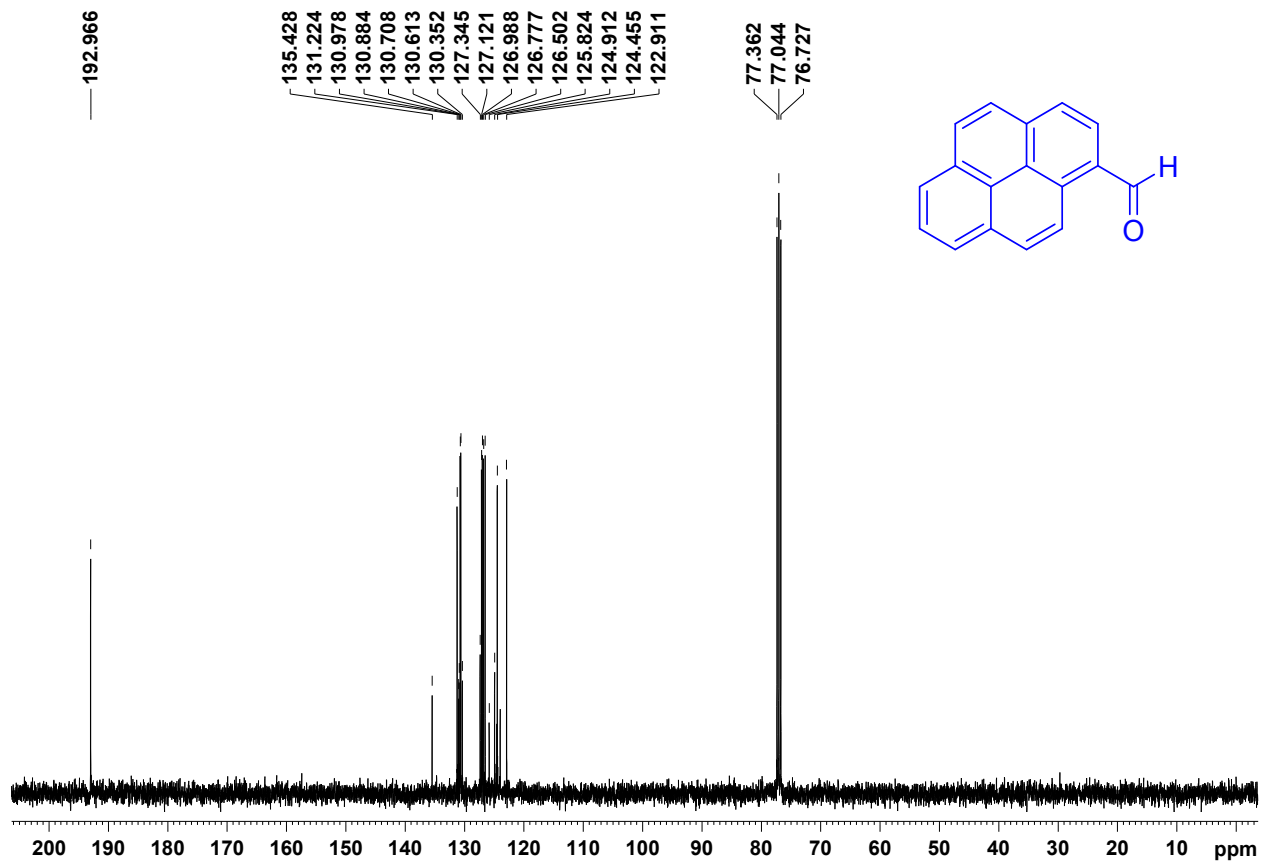

# HRMS DST-FIST Funded, Department of Chemistry, IIT Madras

## ESI Mass Report

|                       |                      |                           |                                                     |
|-----------------------|----------------------|---------------------------|-----------------------------------------------------|
| <b>Name</b>           | 241019-22-KRR-PY-ALD | <b>Data File Path</b>     | D:\MassHunter\Data\2019\OCT-2019\KRR\PY-ALD.d       |
| <b>Sample ID</b>      |                      | <b>Acq. Time (Local)</b>  | 24-10-2019 12:16:01 (UTC+05:30)                     |
| <b>Instrument</b>     | Instrument 1         | <b>Method Path (Acq)</b>  | D:\MassHunter-Methods\Direct Infusion_HPLC.m        |
| <b>MS Type</b>        | QTOF                 | <b>Version (Acq SW)</b>   | 6200 series TOF/6500 series Q-TOF B.08.00 (B8058.0) |
| <b>Inj. Vol. (ul)</b> | 5                    | <b>IRM Status</b>         | Success                                             |
| <b>Position</b>       | P1-B11               | <b>Method Path (DA)</b>   | D:\MassHunter-Methods\10.0\IIT-Target Screening_1.m |
| <b>Plate Pos.</b>     |                      | <b>Target Source Path</b> |                                                     |
| <b>Operator</b>       |                      | <b>Result Summary</b>     | 1 qualified (1 targets)                             |

## Compound Details

### Cpd. 1: C17 H10 O

Compound Spectra (overlaid)

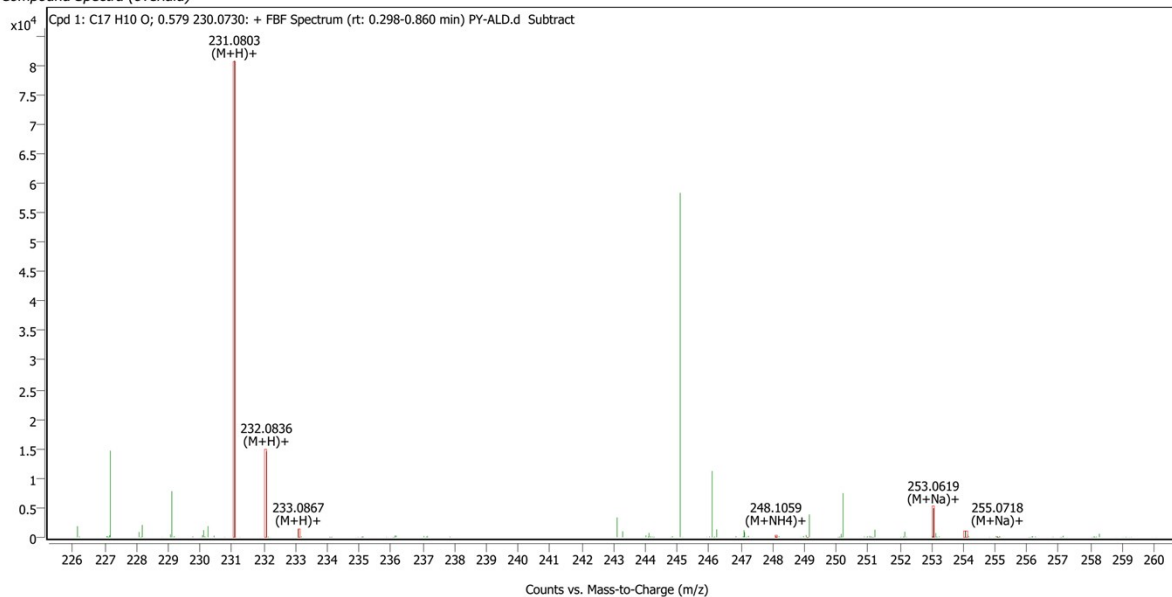

### Compound ID Table

| Cpd | Formula   | Mass (Tgt) | Calc. Mass | Mass     | Species                           | Diff(Tgt.ppm) | mDa   |
|-----|-----------|------------|------------|----------|-----------------------------------|---------------|-------|
| 1   | C17 H10 O | 230.0732   | 230.0730   | 231.0803 | (M+H) <sup>+</sup>                | -0.74         | -0.17 |
|     |           |            |            | 248.1059 | (M+NH <sub>4</sub> ) <sup>+</sup> |               |       |
|     |           |            |            | 253.0619 | (M+Na) <sup>+</sup>               |               |       |

Fig. S2  $^1\text{H}$ ,  $^{13}\text{C}$  and Mass spectrum of intermediate (3).

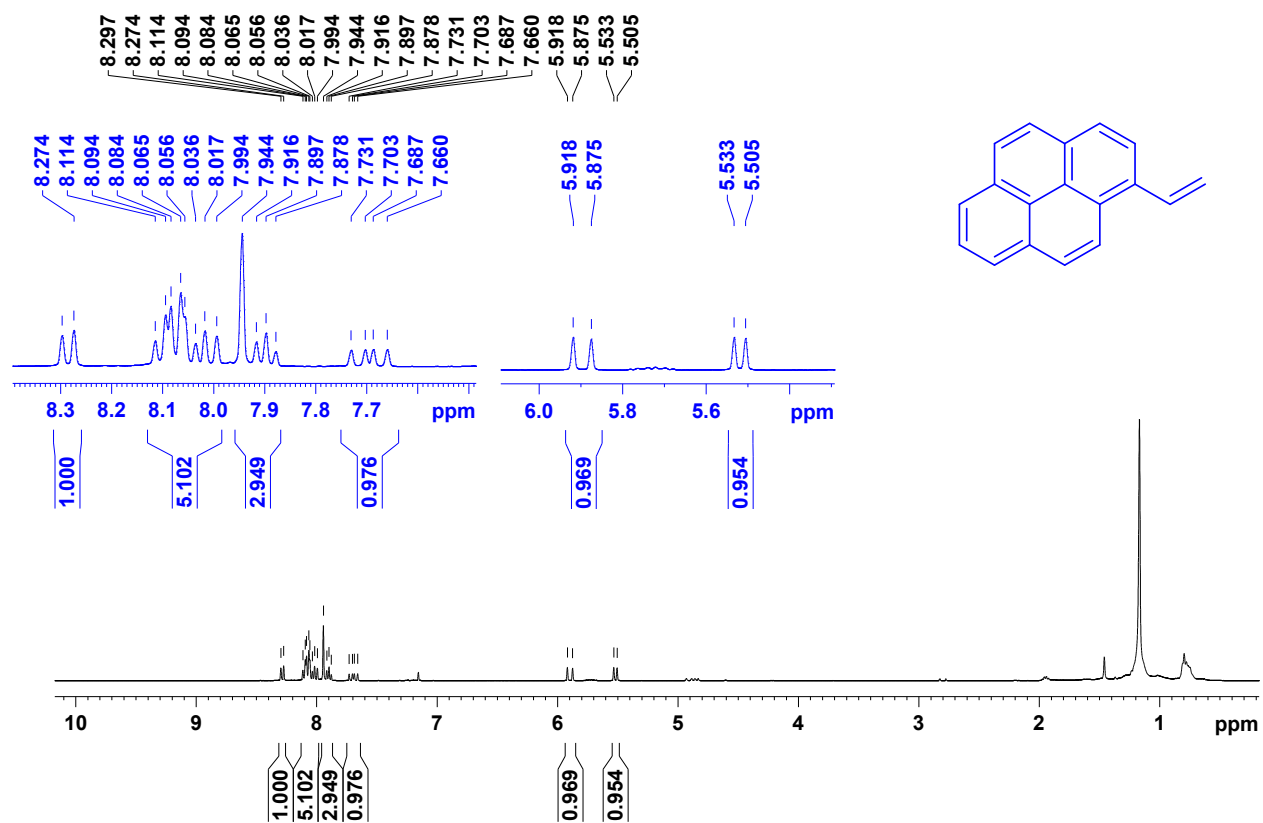

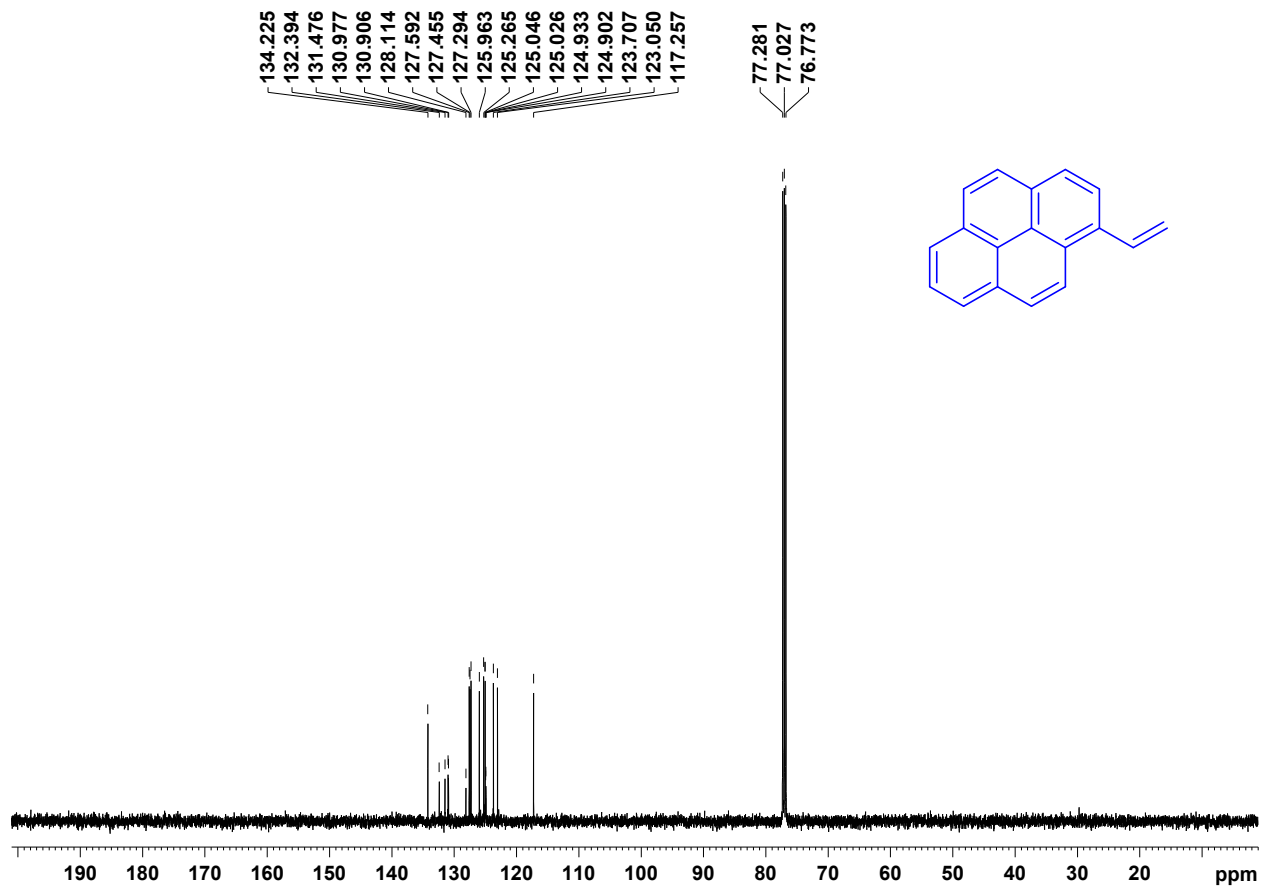



# HRMS DST-FIST Funded, Department of Chemistry, IIT Madras

## ESI Mass Report

|                       |                       |                           |                                                     |
|-----------------------|-----------------------|---------------------------|-----------------------------------------------------|
| <b>Name</b>           | 060919-4-KRR-Du-PY-VI | <b>Data File Path</b>     | D:\MassHunter\Data\2019\SEP-2019\KRR\Du-PY-VI.d     |
| <b>Sample ID</b>      |                       | <b>Acq. Time (Local)</b>  | 06-09-2019 09:23:02 (UTC+05:30)                     |
| <b>Instrument</b>     | Instrument 1          | <b>Method Path (Acq)</b>  | D:\MassHunter\Methods\Direct Infusion_HPLC.m        |
| <b>MS Type</b>        | QTOF                  | <b>Version (Acq SW)</b>   | 6200 series TOF/6500 series Q-TOF B.08.00 (B8058.0) |
| <b>Inj. Vol. (ul)</b> | 5                     | <b>IRM Status</b>         | Success                                             |
| <b>Position</b>       | P2-D4                 | <b>Method Path (DA)</b>   | D:\MassHunter\Methods\10.0\IIT-Target Screening_1.m |
| <b>Plate Pos.</b>     |                       | <b>Target Source Path</b> |                                                     |
| <b>Operator</b>       |                       | <b>Result Summary</b>     | 1 qualified (1 targets)                             |

## Compound Details

### Cpd. 1: C18 H12

#### Compound Spectra (overlaid)

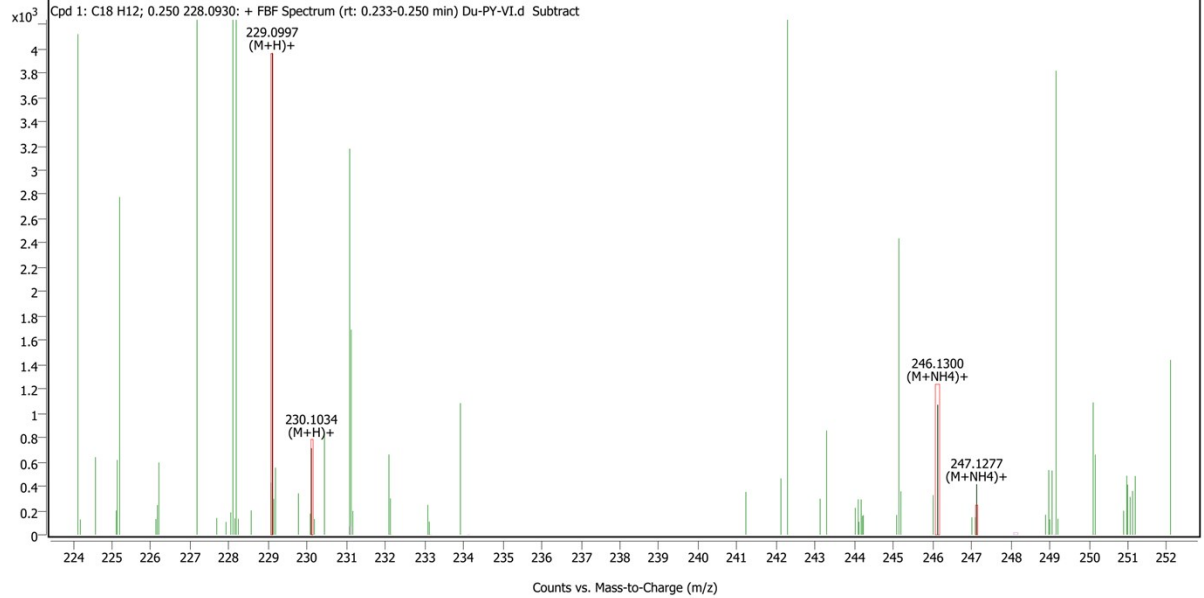

#### Compound ID Table

| Cpd | Formula | Mass (Tgt) | Calc. Mass | Mass                 | Species                                                 | Diff(Tgt.ppm) | mDa   |
|-----|---------|------------|------------|----------------------|---------------------------------------------------------|---------------|-------|
| 1   | C18 H12 | 228.0939   | 228.0930   | 229.0997<br>246.1300 | (M+H) <sup>+</sup><br>(M+NH <sub>4</sub> ) <sup>+</sup> | -3.97         | -0.91 |

Fig. S3  $^1\text{H}$ ,  $^{13}\text{C}$  and Mass spectrum of intermediate (8).

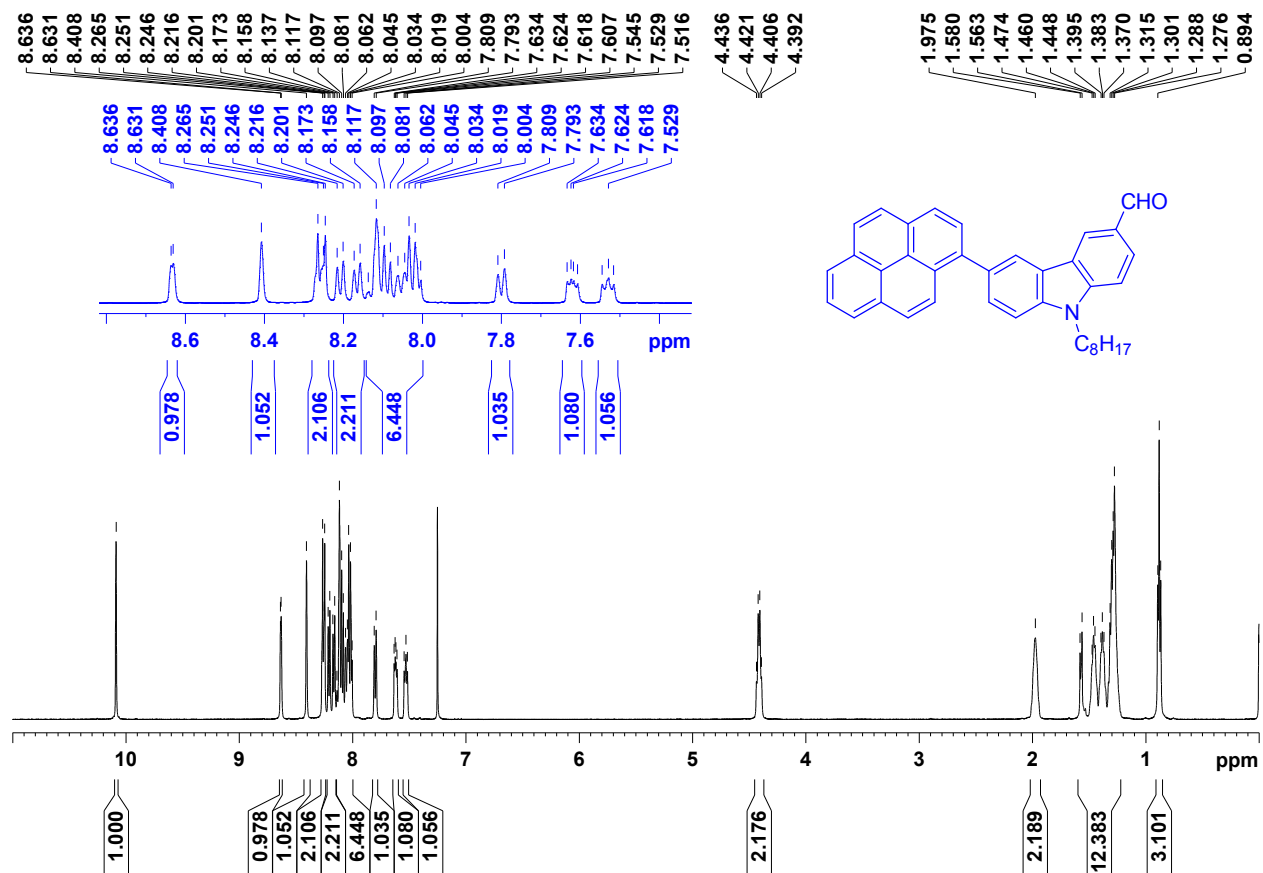

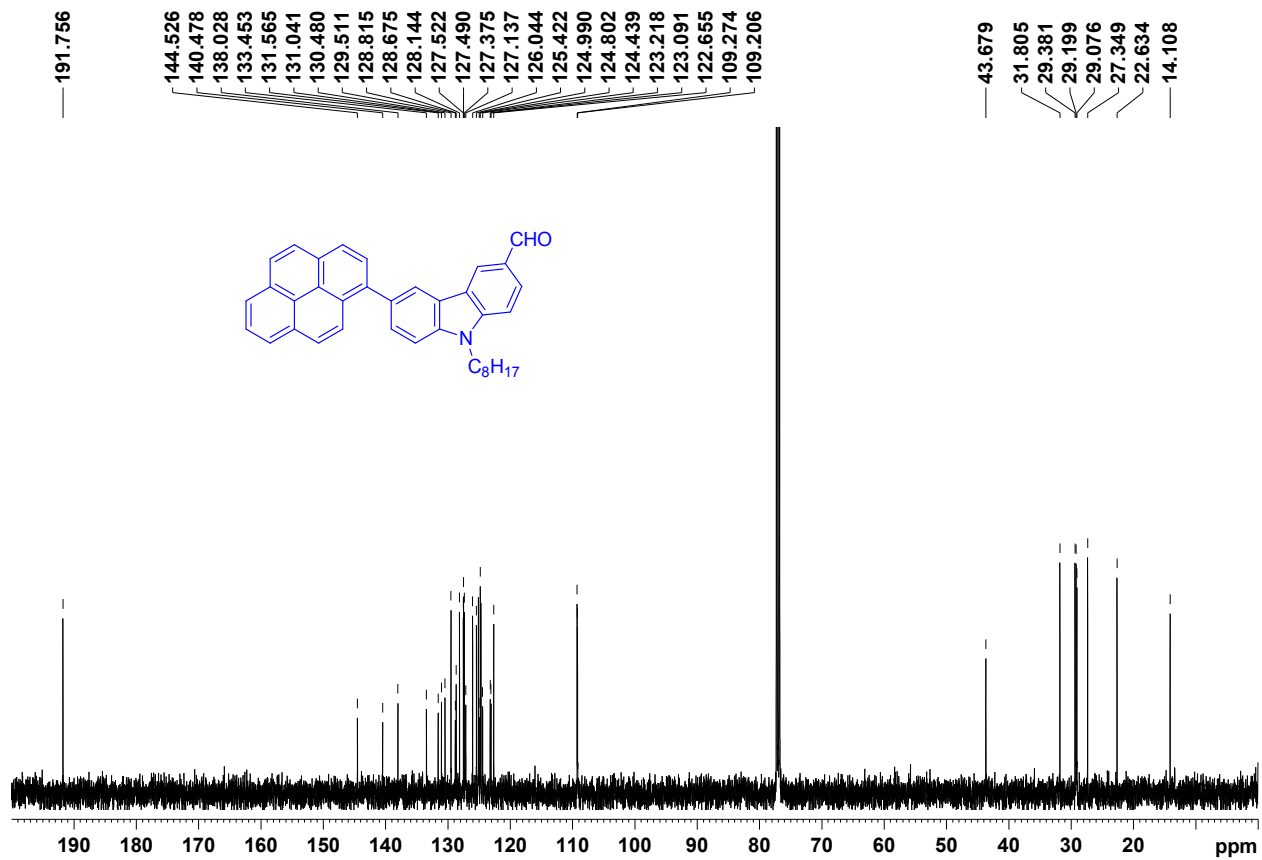

# HRMS DST-FIST Funded, Department of Chemistry, IIT Madras

## ESI Mass Report

|                       |              |                           |                                                  |
|-----------------------|--------------|---------------------------|--------------------------------------------------|
| <b>Name</b>           | 14022020-KRR | <b>Data File Path</b>     | D:\MassHunter\Data\2020\FEB-2020\KRR\PY-CBZ-SU.d |
| <b>Sample ID</b>      |              | <b>Acq. Time (Local)</b>  | 14-02-2020 18:20:44 (UTC+05:30)                  |
| <b>Instrument</b>     | Instrument 1 | <b>Method Path (Acq)</b>  | D:\MassHunter\Methods\Direct Infusion_HPLC.m     |
| <b>MS Type</b>        | QTOF         | <b>Version (Acq SW)</b>   | 6200 series TOF/6500 series Q-TOF 10.1 (48.0)    |
| <b>Inj. Vol. (ul)</b> | 2            | <b>IRM Status</b>         | Success                                          |
| <b>Position</b>       | P1-E11       | <b>Method Path (DA)</b>   | D:\MassHunter\Methods\10.0\Default.m             |
| <b>Plate Pos.</b>     |              | <b>Target Source Path</b> |                                                  |
| <b>Operator</b>       |              | <b>Result Summary</b>     | 1 qualified (1 targets)                          |

## Compound Details

**Cpd. 1: C<sub>37</sub> H<sub>33</sub> N O**

Compound Spectra (overlaid)

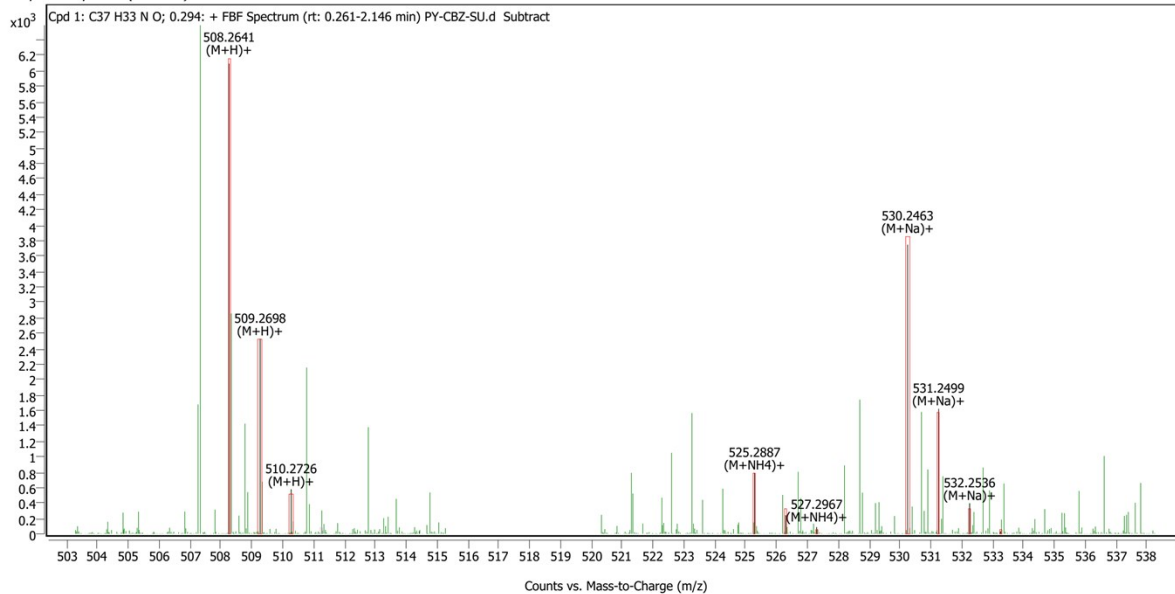

Compound ID Table

| Cpd | Formula                             | Mass (Tgt) | Calc. Mass | Mass     | Species                           | Diff(Tgt.ppm) | mDa  |
|-----|-------------------------------------|------------|------------|----------|-----------------------------------|---------------|------|
| 1   | C <sub>37</sub> H <sub>33</sub> N O | 507.2562   | 507.2573   | 508.2641 | (M+H) <sup>+</sup>                | 2.17          | 1.10 |
|     |                                     |            |            | 525.2887 | (M+NH <sub>4</sub> ) <sup>+</sup> |               |      |
|     |                                     |            |            | 530.2463 | (M+Na) <sup>+</sup>               |               |      |

Fig. S4  $^1\text{H}$ ,  $^{13}\text{C}$  and Mass spectrum of intermediate (9).

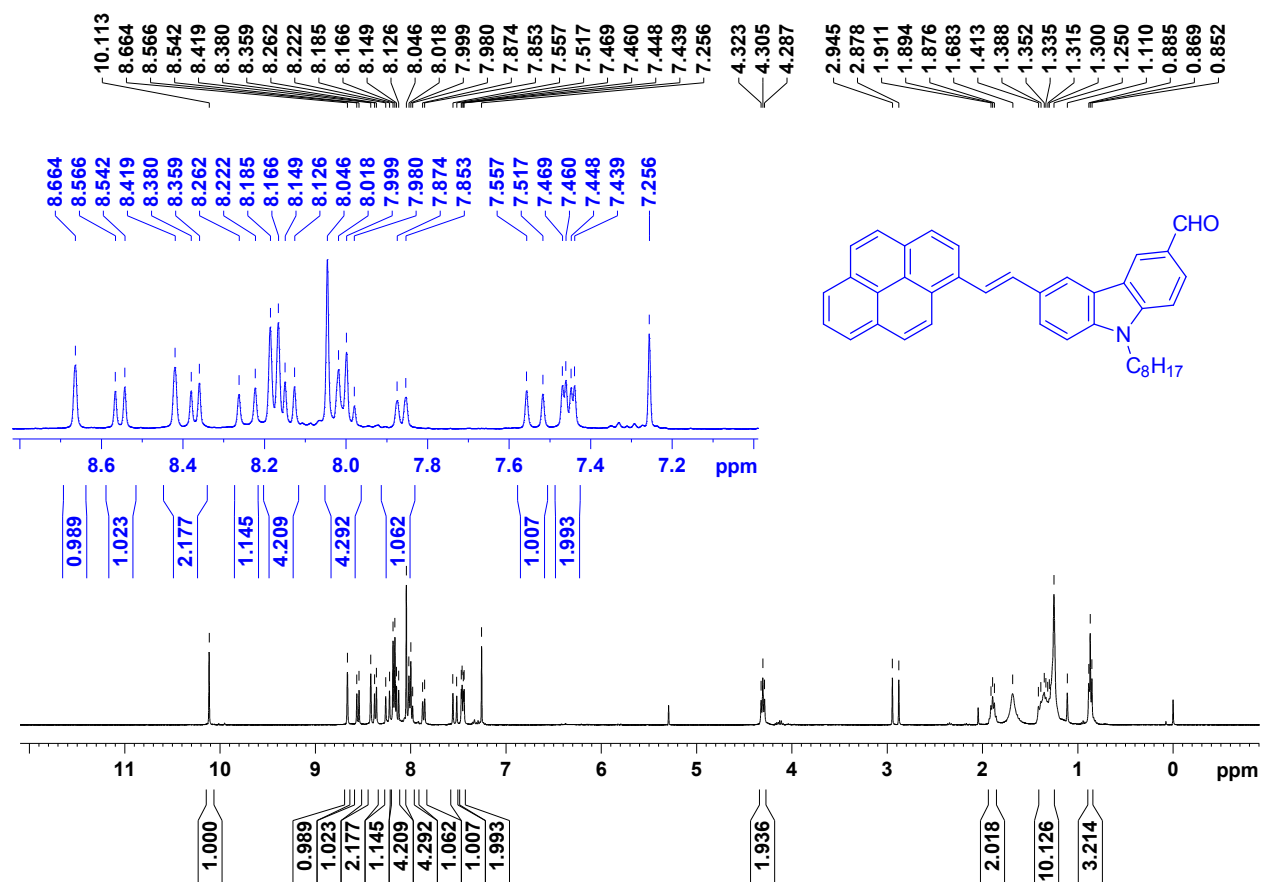

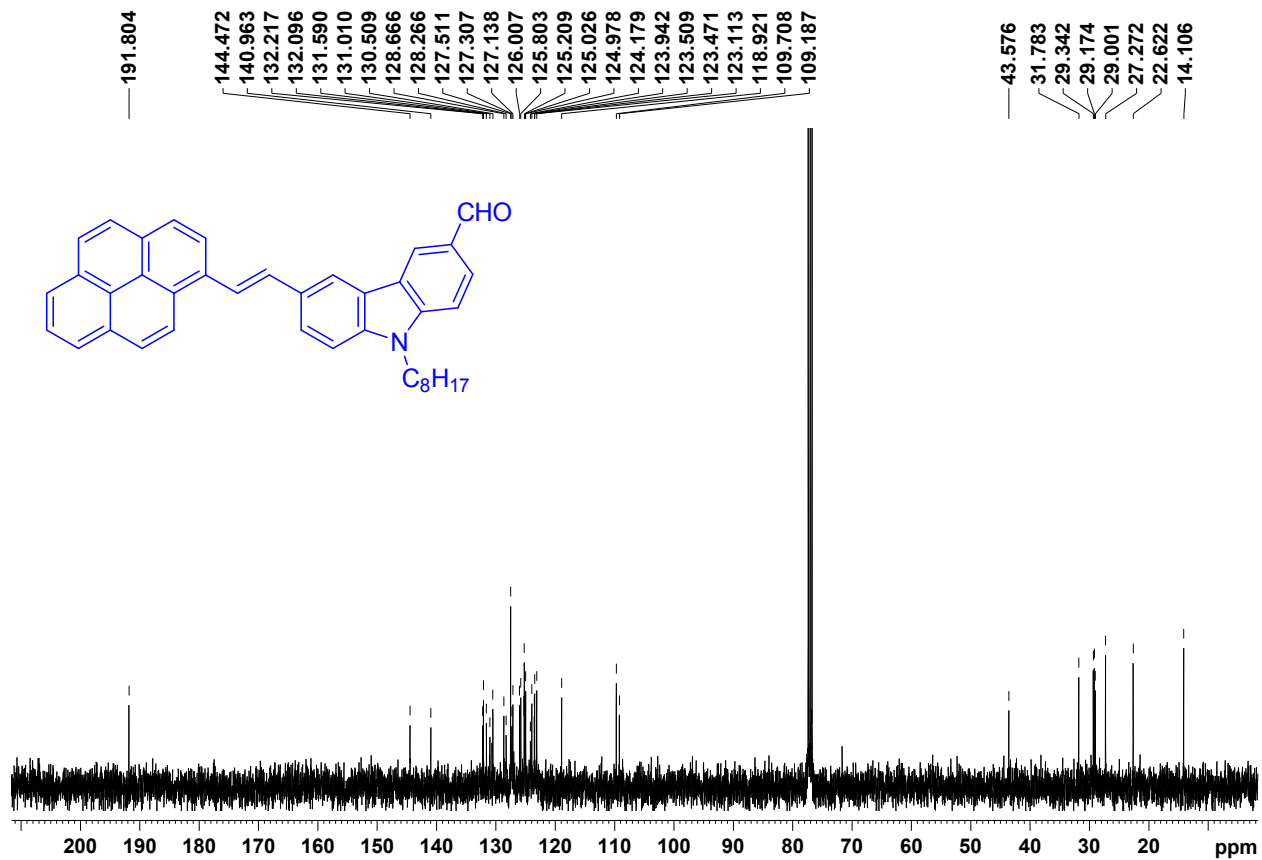

# HRMS DST-FIST Funded, Department of Chemistry, IIT Madras

## ESI Mass Report

|                       |                          |                           |                                                     |
|-----------------------|--------------------------|---------------------------|-----------------------------------------------------|
| <b>Name</b>           | 160919-4-KRR-Du-PY-VI-AL | <b>Data File Path</b>     | D:\MassHunter\Data\2019\SEP-2019\KRR\Du-PY-VI-AL.d  |
| <b>Sample ID</b>      |                          | <b>Acq. Time (Local)</b>  | 16-09-2019 09:20:01 (UTC+05:30)                     |
| <b>Instrument</b>     | Instrument 1             | <b>Method Path (Acq)</b>  | D:\MassHunter\Methods\Direct Infusion_HPLC.m        |
| <b>MS Type</b>        | QTOF                     | <b>Version (Acq SW)</b>   | 6200 series TOF/6500 series Q-TOF B.08.00 (B8058.0) |
| <b>Inj. Vol. (ul)</b> | 5                        | <b>IRM Status</b>         | Success                                             |
| <b>Position</b>       | P2-D4                    | <b>Method Path (DA)</b>   | D:\MassHunter\Methods\10.0\IIT-Target Screening_1.m |
| <b>Plate Pos.</b>     |                          | <b>Target Source Path</b> |                                                     |
| <b>Operator</b>       |                          | <b>Result Summary</b>     | 1 qualified (1 targets)                             |

## Compound Details

### Cpd. 1: C39 H35 N O

Compound Spectra (overlaid)

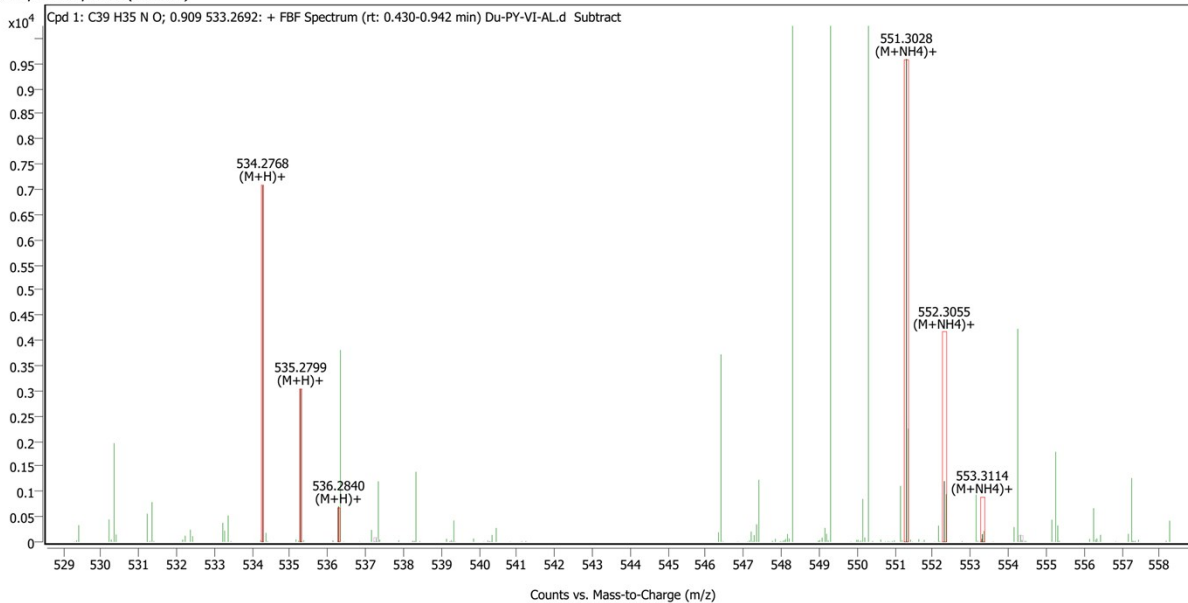

### Compound ID Table

| Cpd | Formula     | Mass (Tgt) | Calc. Mass | Mass                 | Species                                                 | Diff(Tgt.ppm) | mDa   |
|-----|-------------|------------|------------|----------------------|---------------------------------------------------------|---------------|-------|
| 1   | C39 H35 N O | 533.2719   | 533.2692   | 534.2768<br>551.3028 | (M+H) <sup>+</sup><br>(M+NH <sub>4</sub> ) <sup>+</sup> | -4.92         | -2.62 |

Fig. S5  $^1\text{H}$ ,  $^{13}\text{C}$  and Mass spectrum of PC1 dye.

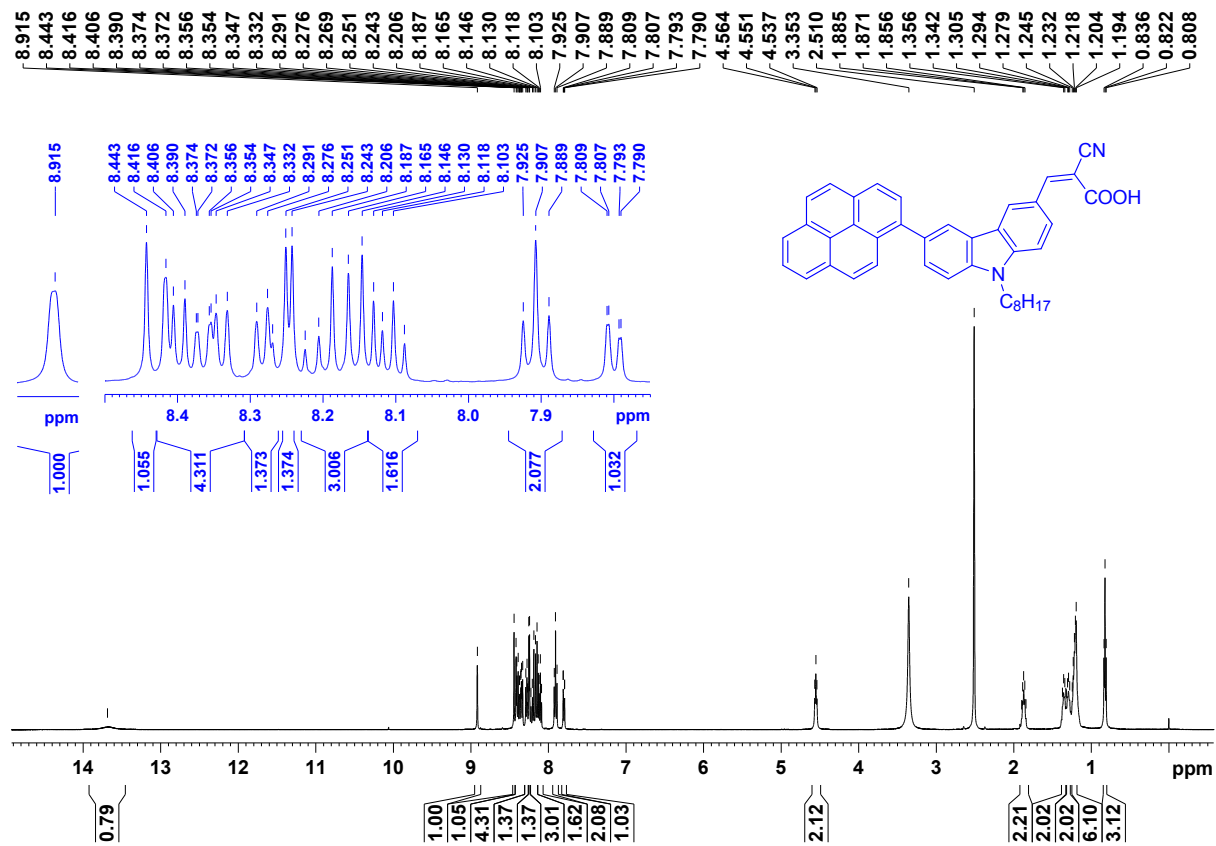



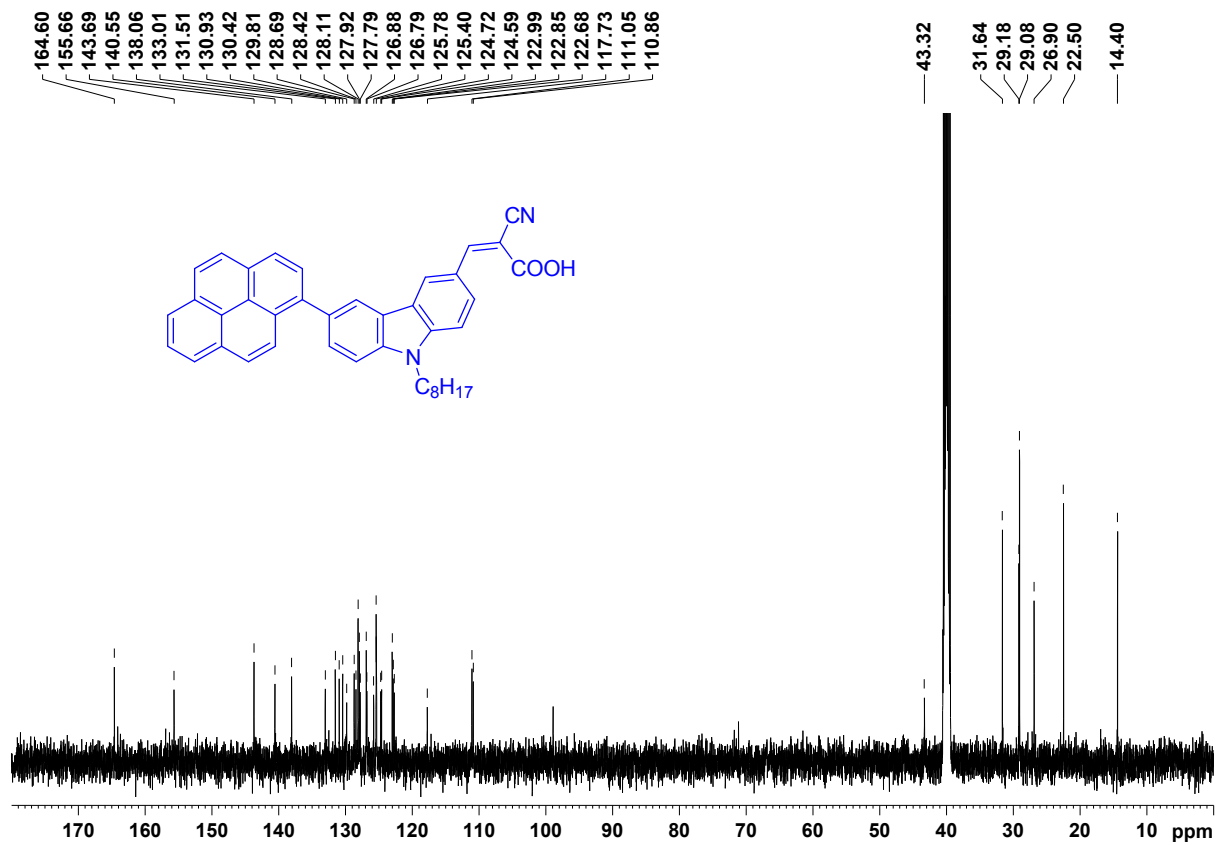

# HRMS DST-FIST Funded, Department of Chemistry, IIT Madras

## ESI Mass Report

|                       |                           |                           |                                                     |
|-----------------------|---------------------------|---------------------------|-----------------------------------------------------|
| <b>Name</b>           | 10122019-16-KRR-PY-CBZ-AC | <b>Data File Path</b>     | D:\MassHunter\Data\2019\NOV-2019\KRR\PY-CBZ-AC.d    |
| <b>Sample ID</b>      |                           | <b>Acq. Time (Local)</b>  | 11-12-2019 10:32:42 (UTC+05:30)                     |
| <b>Instrument</b>     | Instrument 1              | <b>Method Path (Acq)</b>  | D:\MassHunter\Methods\Direct Infusion_HPLC-NEW.m    |
| <b>MS Type</b>        | QTOF                      | <b>Version (Acq SW)</b>   | 6200 series TOF/6500 series Q-TOF B.08.00 (B8058.0) |
| <b>Inj. Vol. (ul)</b> | 2                         | <b>IRM Status</b>         | All ions missed                                     |
| <b>Position</b>       | P1-B5                     | <b>Method Path (DA)</b>   | D:\MassHunter\Methods\10.0\Default.m                |
| <b>Plate Pos.</b>     |                           | <b>Target Source Path</b> |                                                     |
| <b>Operator</b>       |                           | <b>Result Summary</b>     | 1 qualified (1 targets)                             |

## Compound Details

**Cpd. 1: C40 H34 N2 O2**

*Compound Spectra (overlaid)*

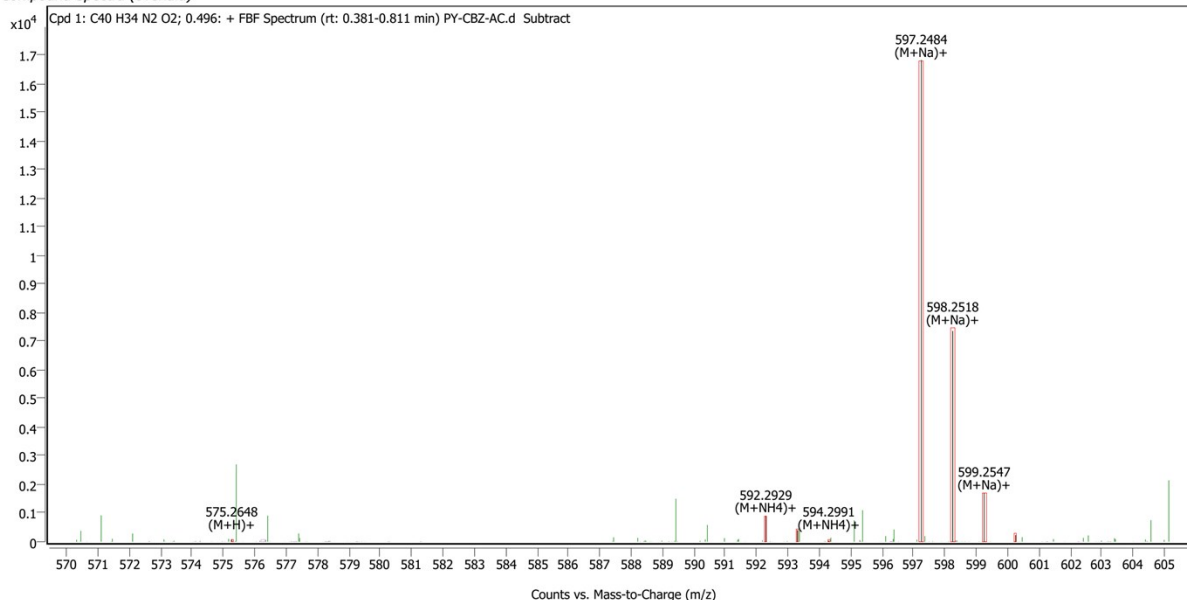

*Compound ID Table*

| Cpd | Formula       | Mass (Tgt) | Calc. Mass | Mass     | Species  | Diff(Tgt.ppm) | mDa   |
|-----|---------------|------------|------------|----------|----------|---------------|-------|
| 1   | C40 H34 N2 O2 | 574.2620   | 574.2592   | 575.2648 | (M+H)+   | -4.91         | -2.82 |
|     |               |            |            | 592.2929 | (M+NH4)+ |               |       |
|     |               |            |            | 597.2484 | (M+Na)+  |               |       |

Fig. S6  $^1\text{H}$ ,  $^{13}\text{C}$  and Mass spectrum of PC2 dye.

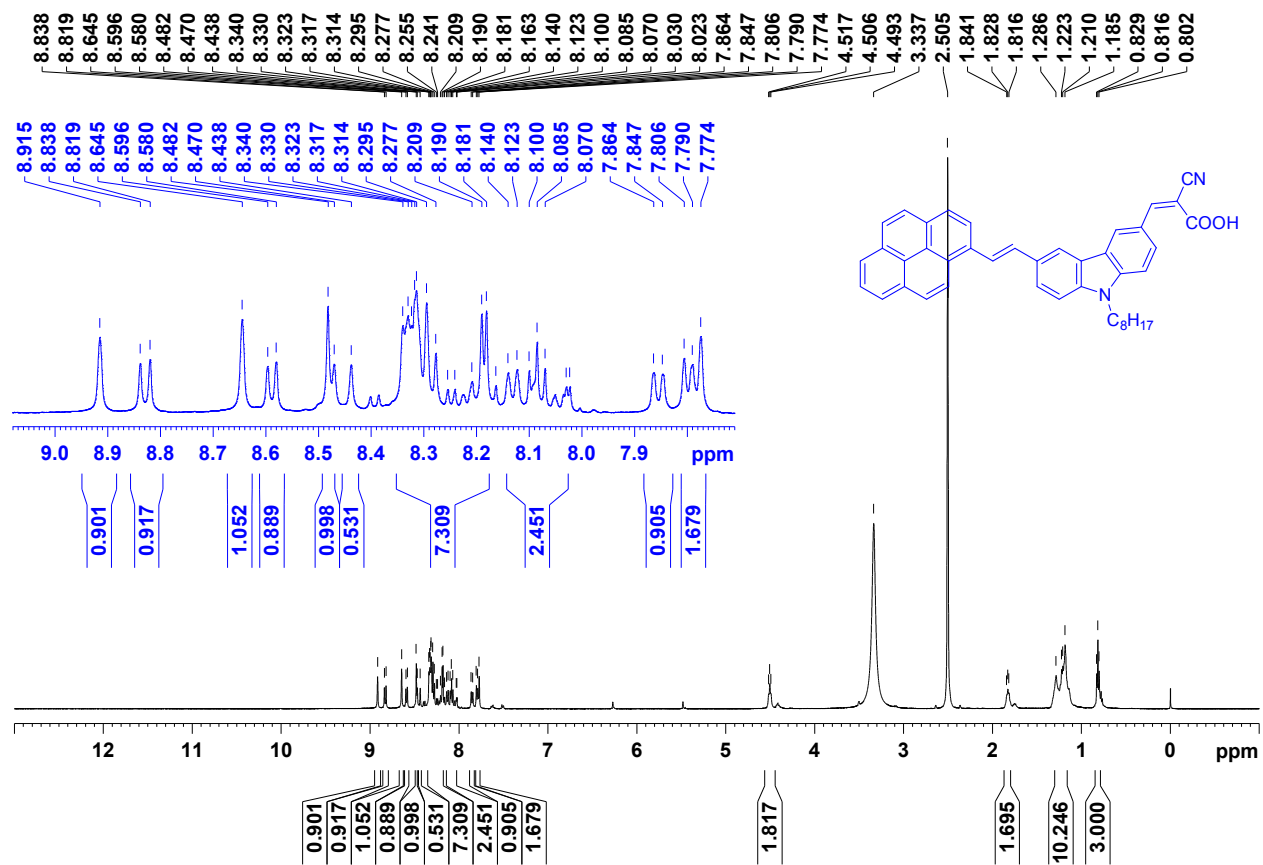

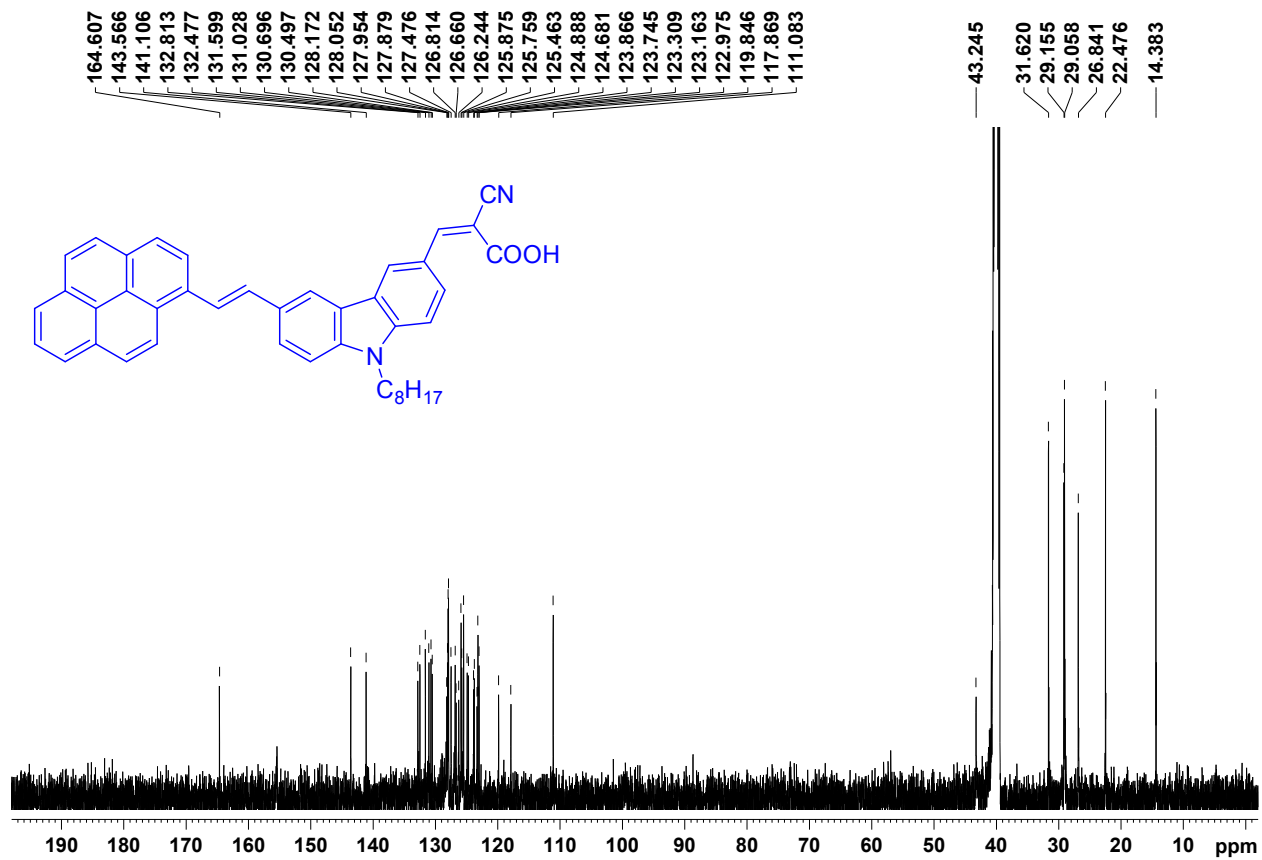

# HRMS DST-FIST Funded, Department of Chemistry, IIT Madras

## ESI Mass Report

|                       |                    |                           |                                                     |
|-----------------------|--------------------|---------------------------|-----------------------------------------------------|
| <b>Name</b>           | 031019-23-KRR-Py-D | <b>Data File Path</b>     | D:\MassHunter\Data\2019\OCT-2019\KRR\Py-D.d         |
| <b>Sample ID</b>      |                    | <b>Acq. Time (Local)</b>  | 03-10-2019 11:51:09 (UTC+05:30)                     |
| <b>Instrument</b>     | Instrument 1       | <b>Method Path (Acq)</b>  | D:\MassHunter\Methods\Direct Infusion_HPLC.m        |
| <b>MS Type</b>        | QTOF               | <b>Version (Acq SW)</b>   | 6200 series TOF/6500 series Q-TOF B.08.00 (B8058.0) |
| <b>Inj. Vol. (ul)</b> | 5                  | <b>IRM Status</b>         | Success                                             |
| <b>Position</b>       | P1-C1              | <b>Method Path (DA)</b>   | D:\MassHunter\Methods\10.0\IIT-Target Screening_1.m |
| <b>Plate Pos.</b>     |                    | <b>Target Source Path</b> |                                                     |
| <b>Operator</b>       |                    | <b>Result Summary</b>     | 1 qualified (1 targets)                             |

## Compound Details

**Cpd. 1: C42 H36 N2 O2**

Compound Spectra (overlaid)

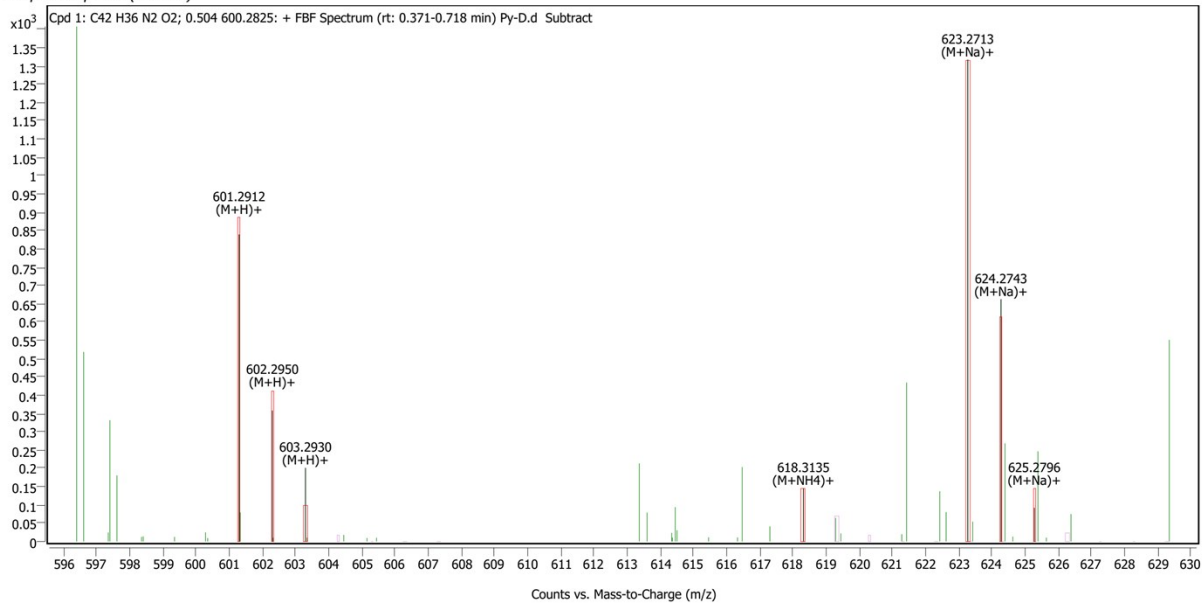

Compound ID Table

| Cpd | Formula       | Mass (Tgt) | Calc. Mass | Mass     | Species                           | Diff(Tgt.ppm) | mDa  |
|-----|---------------|------------|------------|----------|-----------------------------------|---------------|------|
| 1   | C42 H36 N2 O2 | 600.2777   | 600.2825   | 601.2912 | (M+H) <sup>+</sup>                | 8.00          | 4.80 |
|     |               |            |            | 618.3135 | (M+NH <sub>4</sub> ) <sup>+</sup> |               |      |
|     |               |            |            | 623.2713 | (M+Na) <sup>+</sup>               |               |      |

**Fig. S7** Thickness of mesoporous TiO<sub>2</sub> coated on FTO plate measured using Nanomap Profilometer.

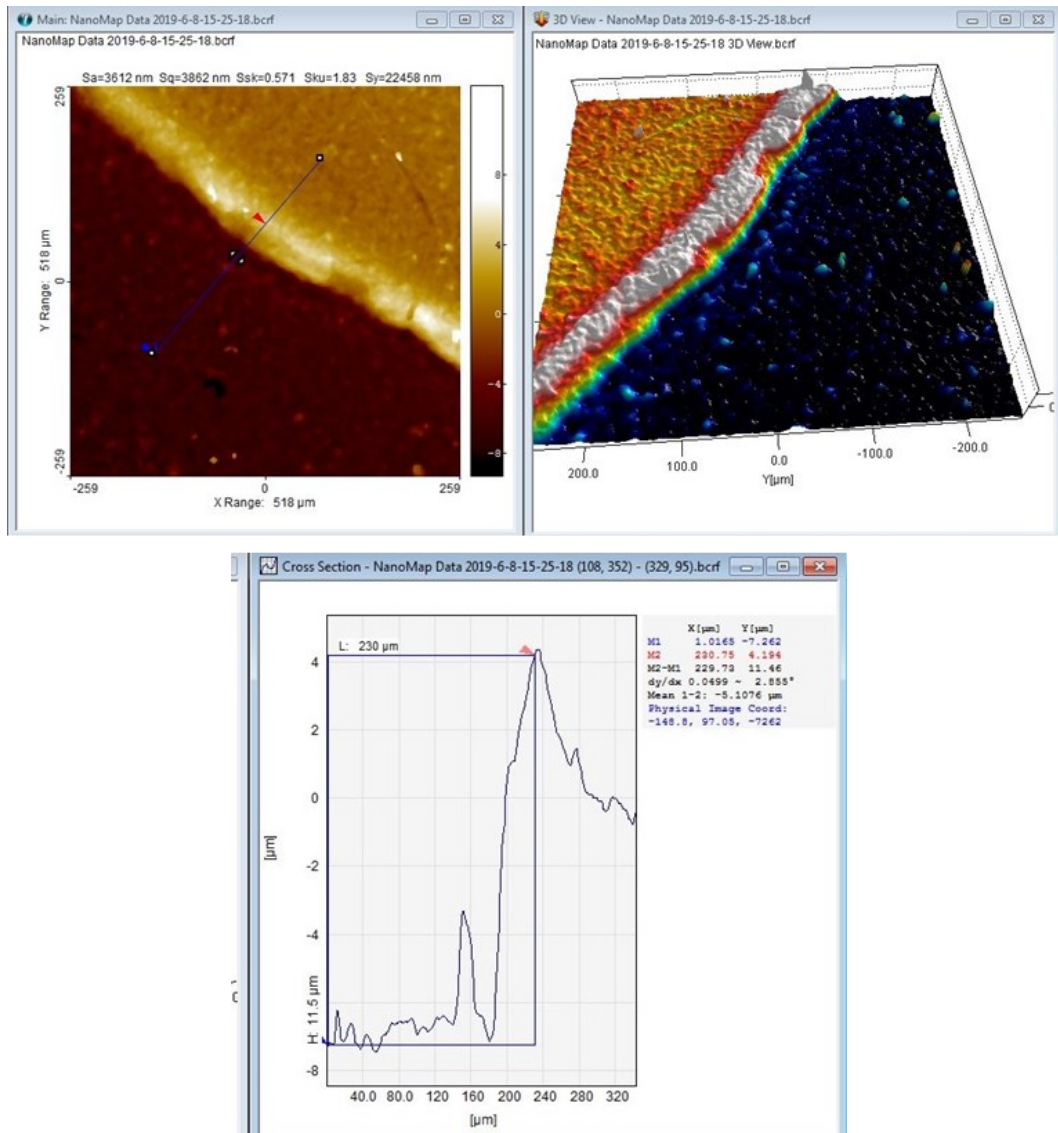

**Fig. S8** *J-V* characteristics of devices sensitized with different solvents in without and with CDCA **PC0** (a, b) **PC1** (c, d) **PC2** (e, f) under one sun illumination ( $100 \text{ mWcm}^{-2}$ ).

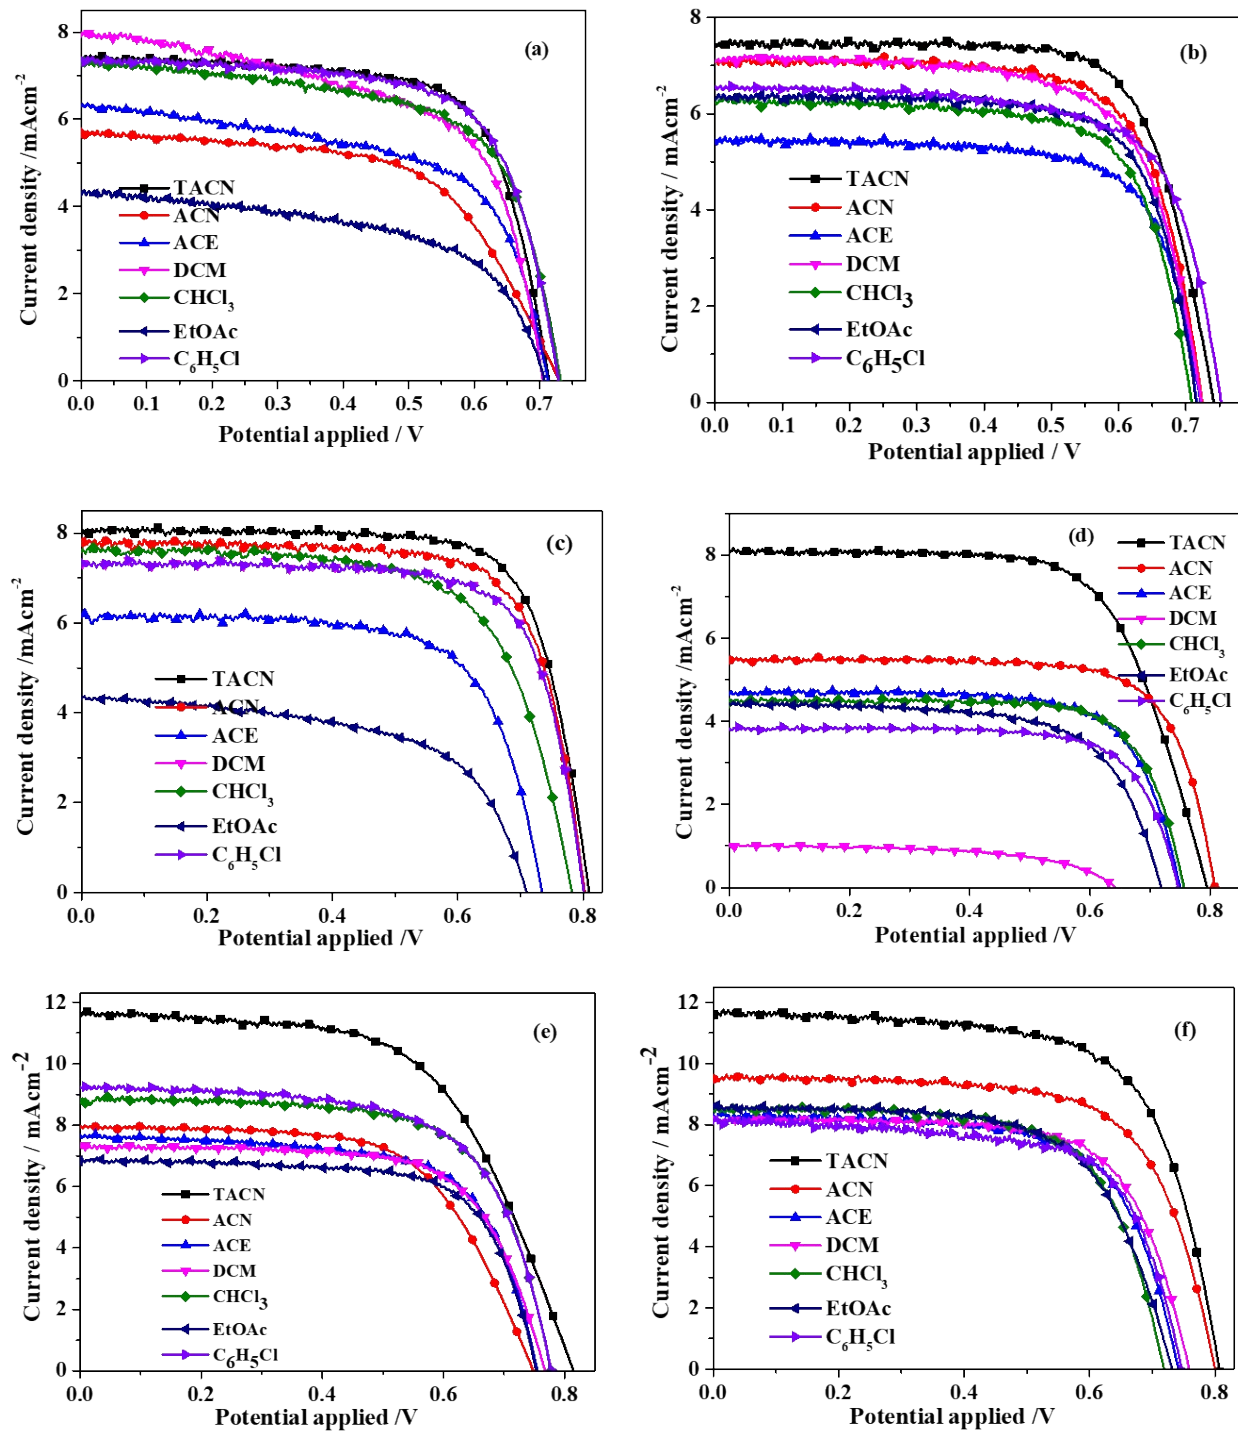

**Table S1** HOMO, LUMO, calculated using B3LYP, CAM-B3LYP, M06, M06-2X, PBE1PBE, WB97XD/ 6-31G(d,p) method.

| Name of the Dye | B3LYP                  |                        | CAM-B3LYP              |                        | M06                    |                        | M062X                  |                        | PBE1PBE                |                        | WB97XD                 |                        |
|-----------------|------------------------|------------------------|------------------------|------------------------|------------------------|------------------------|------------------------|------------------------|------------------------|------------------------|------------------------|------------------------|
|                 | E <sub>HOMO</sub> (eV) | E <sub>LUMO</sub> (eV) |
| <b>PC0</b>      | -5.67                  | -2.65                  | -6.82                  | -1.39                  | -5.93                  | -2.51                  | -6.83                  | -1.76                  | -5.93                  | -2.58                  | -7.42                  | -0.86                  |
| <b>PC1</b>      | -5.32                  | -2.22                  | -6.51                  | -1.14                  | -5.59                  | -2.21                  | -6.5                   | -1.49                  | -5.59                  | -2.27                  | -7.12                  | -0.64                  |
| <b>PC2</b>      | -5.12                  | -2.37                  | -6.3                   | -1.17                  | -5.39                  | -2.24                  | -6.32                  | -1.53                  | -5.8                   | -2.3                   | -6.9                   | -0.68                  |

**Table S2** The projected density of states (PDOS) analysis of three dyes obtained using the B3LYP/6-31G(d,p) method.

| Dye        | MO   | Acceptor | Linker | Donor |
|------------|------|----------|--------|-------|
| <b>PC0</b> | LUMO | 56       | NA     | 44    |
|            | HOMO | 8        | NA     | 92    |
| <b>PC1</b> | LUMO | 65       | NA     | 35    |
|            | HOMO | 1        | NA     | 99    |
| <b>PC2</b> | LUMO | 62       | 2      | 36    |
|            | HOMO | 1        | 15     | 84    |



**Table S3** Optimization of solvents for **PC0** dye.

| Solvents for <b>PC0</b> dye         | $V_{oc}$ (V)<br>without/<br>with CDCA | $J_{sc}$ (mA cm <sup>-2</sup> )<br>without/<br>with CDCA | FF<br>without/<br>with CDCA | $\eta$ (%)<br>without/<br>with<br>CDCA |
|-------------------------------------|---------------------------------------|----------------------------------------------------------|-----------------------------|----------------------------------------|
| <b>TACN</b>                         | 0.71/0.74                             | 7.40/7.39                                                | 0.70/0.73                   | 3.70/3.99                              |
| <b>ACN</b>                          | 0.73/0.72                             | 5.73/7.02                                                | 0.59/0.72                   | 2.47/3.64                              |
| <b>ACE</b>                          | 0.71/0.72                             | 6.33/5.40                                                | 0.60/0.72                   | 2.70/2.79                              |
| <b>DCM</b>                          | 0.70/0.72                             | 7.97/7.07                                                | 0.59/0.68                   | 3.33/3.46                              |
| <b>CHCl<sub>3</sub></b>             | 0.73/0.70                             | 7.30/6.22                                                | 0.64/0.72                   | 3.41/3.13                              |
| <b>EtOAc</b>                        | 0.71/0.72                             | 4.28/6.32                                                | 0.56/0.73                   | 1.68/3.32                              |
| <b>C<sub>6</sub>H<sub>5</sub>Cl</b> | 0.73/0.75                             | 7.33/6.52                                                | 0.68/0.69                   | 3.64/3.37                              |

**Table S4** Optimization of solvents for **PC1** dye.

| Solvents for<br><b>PC1</b> dye      | $V_{oc}$ (V)<br>without/<br>with CDCA | $J_{sc}$ (mA cm <sup>-2</sup> )<br>without/ with<br>CDCA | FF<br>without/ with<br>CDCA | $\eta$ (%)<br>without/<br>with CDCA |
|-------------------------------------|---------------------------------------|----------------------------------------------------------|-----------------------------|-------------------------------------|
| <b>TACN</b>                         | 0.80/ 0.79                            | 8.07/ 8.08                                               | 0.76/ 0.68                  | 4.90/ 4.34                          |
| <b>ACN</b>                          | 0.80/0.81                             | 7.78/5.48)                                               | 0.74/0.74                   | 4.60/3.27                           |
| <b>ACE</b>                          | 0.73/0.75                             | 6.12/4.64                                                | 0.69/0.72                   | 3.08/2.50                           |
| <b>DCM</b>                          | 0.79/0.64                             | 7.27/1.0                                                 | 0.75/0.57                   | 4.32/0.36                           |
| <b>CHCl<sub>3</sub></b>             | 0.78/0.76                             | 7.59/4.47                                                | 0.67/0.75                   | 3.97/2.55                           |
| <b>EtOAc</b>                        | 0.71/0.72                             | 4.32/4.40                                                | 0.59/0.66                   | 1.80/2.09                           |
| <b>C<sub>6</sub>H<sub>5</sub>Cl</b> | 0.80/0.75                             | 7.29/3.79                                                | 0.74/0.73                   | 4.34/2.07                           |

**Table S5** Optimization of solvents for **PC2** dye.

| Solvents for <b>PC2</b> dye         | $V_{oc}$ (V)<br>without/<br>with<br>CDCA | $J_{sc}$ (mA cm <sup>-2</sup> )<br>without/ with<br>CDCA | FF<br>without/<br>with<br>CDCA | $\eta$ (%)<br>without/<br>with<br>CDCA |
|-------------------------------------|------------------------------------------|----------------------------------------------------------|--------------------------------|----------------------------------------|
| <b>TACN</b>                         | 0.81/0.80                                | 11.57/11.59                                              | 0.60/0.68                      | 5.57/6.30                              |
| <b>ACN</b>                          | 0.75/0.79                                | 7.95/9.49                                                | 0.62/0.69                      | 3.69/5.17                              |
| <b>ACE</b>                          | 0.75/0.74                                | 7.61/8.28                                                | 0.66/0.67                      | 3.77/4.10                              |
| <b>DCM</b>                          | 0.77/0.76                                | 7.24/8.13                                                | 0.68/0.69                      | 3.79/4.27                              |
| <b>CHCl<sub>3</sub></b>             | 0.71/0.72                                | 6.15/8.42                                                | 0.65/0.70                      | 2.84/4.12                              |
| <b>EtOAc</b>                        | 0.75/0.73                                | 6.82/8.56                                                | 0.69/0.65                      | 3.53/4.06                              |
| <b>C<sub>6</sub>H<sub>5</sub>Cl</b> | 0.75/0.74                                | 7.38/8.12                                                | 0.64/0.67                      | 3.54/4.03                              |
